# Supplementary material for: User Experience during an Immersive Virtual Reality-Based Cognitive Task: A Comparison between Estonian and Italian Older Adults with MCI
Source: MDPI journal article supplement (doi:10.3390/s22218249), 2022-10-27
Supplement: s1 [file s1]

Table S1: Correlations coefficients between SSQ and ITC-SOPI side effects subscale pre and post-experience in the Virtual Supermarket;

|             | SSQ-N pre         | SSQ-O pre         | SSQ-D pre         | SSQ-TS pre        | SSQ-N post        | SSQ-O post        | SSQ-D post        | SSQ-TS post       | SE post |
|-------------|-------------------|-------------------|-------------------|-------------------|-------------------|-------------------|-------------------|-------------------|---------|
| SSQ-N pre   |                   |                   |                   |                   |                   |                   |                   |                   |         |
| SSQ-O pre   | .836 <sup>§</sup> |                   |                   |                   |                   |                   |                   |                   |         |
| SSQ-D pre   | .542*             | .687 <sup>§</sup> |                   |                   |                   |                   |                   |                   |         |
| SSQ-TS pre  | .841 <sup>§</sup> | .961 <sup>§</sup> | .751 <sup>§</sup> |                   |                   |                   |                   |                   |         |
| SSQ-N post  | .357              | .456              | .056              | .437              |                   |                   |                   |                   |         |
| SSQ-O post  | .644 <sup>§</sup> | .603*             | .570*             | .672 <sup>§</sup> | .585*             |                   |                   |                   |         |
| SSQ-D post  | .265              | .414              | .742 <sup>§</sup> | .465              | .301              | .793 <sup>§</sup> |                   |                   |         |
| SSQ-TS post | .536*             | .608*             | .561*             | .666 <sup>§</sup> | .695 <sup>§</sup> | .960 <sup>§</sup> | .821 <sup>§</sup> |                   |         |
| SE post     | .569*             | .745 <sup>§</sup> | .709 <sup>§</sup> | .780 <sup>§</sup> | .662 <sup>§</sup> | .855 <sup>§</sup> | .785 <sup>§</sup> | .918 <sup>§</sup> |         |

N: nausea,

O: oculomotor disturbances,

D: disorientation,

TS: total score

SE: side effects

\* $p < 0.05$ , <sup>§</sup> $p < 0.01$ .

Table S2: Correlations coefficients between ITC-SOPI subscales.

|            | <b>SP</b>         | <b>ENG</b>        | <b>N</b> | <b>SE</b> |
|------------|-------------------|-------------------|----------|-----------|
| <b>SP</b>  | -                 |                   |          |           |
| <b>ENG</b> | .835 <sup>§</sup> |                   |          |           |
| <b>N</b>   | .890 <sup>§</sup> | .752 <sup>§</sup> |          |           |
| <b>SE</b>  | -.240             | -.140             | .019     | -         |

SP: spatial presence,

ENG: engagement,

N: naturalness,

SE: side effects,

<sup>§</sup> $p < 0.01$ .

Table S3: Correlations coefficients between TAM3 subscales and SSQ subscales before the experience in the Virtual Supermarket.

|            | BI pre            | BI                | PEOU              | CANX  | ENJ    | SSQ-N pre         | SSQ-O pre         | SSQ-D pre         | SSQ-TS pre |
|------------|-------------------|-------------------|-------------------|-------|--------|-------------------|-------------------|-------------------|------------|
| BI pre     | -                 |                   |                   |       |        |                   |                   |                   |            |
| BI         | .698 <sup>§</sup> |                   |                   |       |        |                   |                   |                   |            |
| PEOU       | .434              | .552*             |                   |       |        |                   |                   |                   |            |
| CANX       | -.148             | -.464             | -.503             |       |        |                   |                   |                   |            |
| ENJ        | .653 <sup>§</sup> | .732 <sup>§</sup> | .841 <sup>§</sup> | -.510 |        |                   |                   |                   |            |
| SSQ-N pre  | -.254             | .114              | -.190             | -.299 | -.111  |                   |                   |                   |            |
| SSQ-O pre  | -.427             | -.127             | -.451             | -.256 | -.434  | .743 <sup>§</sup> |                   |                   |            |
| SSQ-D pre  | -.349             | -.180             | -.530*            | -.042 | -.585* | .323              | .789 <sup>§</sup> |                   |            |
| SSQ-TS pre | -.396             | -.060             | -.419             | -.262 | -.390  | .850 <sup>§</sup> | .979 <sup>§</sup> | .743 <sup>§</sup> | -          |

BI: behavioral intention,  
PEOU: perceived ease-of-use,  
CANX: computer anxiety,  
ENJ: enjoyment,  
N: nausea,  
O: oculomotor disturbances,  
D: disorientation,  
TS: total score,  
\* $p < 0.05$ , <sup>§</sup> $p < 0.01$ .

Table S4: Correlations coefficients between TAM3 subscales and SSQ subscales after the experience in the Virtual Supermarket.

|             | BI pre            | BI                | PEOU               | CANX  | ENJ   | SSQ-N post        | SSQ-O post        | SSQ-D post        | SSQ-TS post |
|-------------|-------------------|-------------------|--------------------|-------|-------|-------------------|-------------------|-------------------|-------------|
| BI pre      | -                 |                   |                    |       |       |                   |                   |                   |             |
| BI          | .698 <sup>§</sup> |                   |                    |       |       |                   |                   |                   |             |
| PEOU        | .434              | .552*             |                    |       |       |                   |                   |                   |             |
| CANX        | -.148             | -.464             | -.503              |       |       |                   |                   |                   |             |
| ENJ         | .653 <sup>§</sup> | .732 <sup>§</sup> | .841 <sup>§</sup>  | -.510 |       |                   |                   |                   |             |
| SSQ-N post  | -.385             | -.026             | -.241              | .043  | -.056 |                   |                   |                   |             |
| SSQ-O post  | -.205             | -.082             | -.506              | .189  | -.301 | .570*             |                   |                   |             |
| SSQ-D post  | -.358             | -.338             | -.666 <sup>§</sup> | .434  | -.514 | .513              | .647 <sup>§</sup> |                   |             |
| SSQ-TS post | -.357             | -.156             | -.545*             | .245  | -.329 | .813 <sup>§</sup> | .901 <sup>§</sup> | .821 <sup>§</sup> | -           |

BI: behavioral intention,  
PEOU: perceived ease-of-use,  
CANX: computer anxiety,  
ENJ: enjoyment,  
N: nausea,  
O: oculomotor disturbances,  
D: disorientation,  
TS: total score,  
\* $p < 0.05$ , <sup>§</sup> $p < 0.01$ .

Table S5: Correlations coefficients between TAM3 and ITC-SOPI subscales.

|        | BI pre            | BI                | PEOU               | CANX  | ENJ    | SP                | ENG               | N    | SE |
|--------|-------------------|-------------------|--------------------|-------|--------|-------------------|-------------------|------|----|
| BI pre | -                 |                   |                    |       |        |                   |                   |      |    |
| BI     | .698 <sup>§</sup> |                   |                    |       |        |                   |                   |      |    |
| PEOU   | .434              | .552*             |                    |       |        |                   |                   |      |    |
| CANX   | -.148             | -.464             | -.503              |       |        |                   |                   |      |    |
| ENJ    | .653 <sup>§</sup> | .732 <sup>§</sup> | .841 <sup>§</sup>  | -.510 |        |                   |                   |      |    |
| SP     | .528*             | .481              | .219               | -.046 | .42    |                   |                   |      |    |
| ENG    | .449              | .572*             | .373               | -.340 | .576*  | .787 <sup>§</sup> |                   |      |    |
| N      | .331              | .443              | .053               | .093  | .198   | .879 <sup>§</sup> | .657 <sup>§</sup> |      |    |
| SE     | -.523*            | -.297             | -.646 <sup>§</sup> | .202  | -.521* | -.125             | -.242             | .081 | -  |

BI: behavioral intention,  
PEOU: perceived ease-of-use,  
CANX: computer anxiety,  
ENJ: enjoyment,  
SP: spatial presence,  
ENG: engagement,  
N: naturalness,  
SE: side effects,  
\* $p < 0.05$ , <sup>§</sup> $p < 0.01$ .
